# Supplementary material for: Deciphering Isoprene Variability Across Dozen of Chinese and Overseas Cities Using Deep Transfer Learning
Source: Copernicus journal article supplement (doi:10.5194/egusphere-2025-4644), 2025-10-14
Supplement: Supplementary file 1 [file egusphere-2025-4644-supplement.pdf]

Supporting Information for

**Deciphering Isoprene Variability Across Dozen of Chinese and Overseas Cities Using Deep Transfer Learning**

Song Liu<sup>1</sup>, Xiaopu Lyu<sup>2\*</sup>, Fumo Yang<sup>1</sup>, Zongbo Shi<sup>3</sup>, Xin Huang<sup>4</sup>, Tengyu Liu<sup>4</sup>, Hongli Wang<sup>5</sup>, Mei Li<sup>6</sup>, Jian Gao<sup>7</sup>, Nan Chen<sup>8</sup>, Guoliang Shi<sup>9</sup>, Yu Zou<sup>10</sup>, Chenglei Pei<sup>11</sup>, Chengxu Tong<sup>3</sup>, Xinyi Liu<sup>1</sup>, Li Zhou<sup>1</sup>, Alex B. Guenther<sup>13</sup>, and Nan Wang<sup>1\*</sup>

<sup>1</sup>College of carbon Neutrality Future Technology, Sichuan University, Chengdu 610065, China.

<sup>2</sup>Department of Geography, Hong Kong Baptist University, Hong Kong 000000, China.

<sup>3</sup>School of Geography, Earth and Environmental Sciences, University of Birmingham, Birmingham m B15 2TT, UK.

<sup>4</sup>School of Atmospheric Sciences, Nanjing University, Nanjing 210023, China.

<sup>5</sup>State Environmental Protection Key Laboratory of Formation and Prevention of Urban Air Pollution Complex, Shanghai Academy of Environmental Sciences, Shanghai, 200233, China.

<sup>6</sup>College of Environment and Climate, Institute of Mass Spectrometry and Atmospheric Environment, Guangdong Provincial Engineering Research Center for On-line Source Apportionment System of Air Pollution, Jinan University.

<sup>7</sup>Chinese Research Academy of Environmental Sciences, Beijing 100012, China.

<sup>8</sup>Research Centre for Complex Air Pollution of Hubei Province, Wuhan 430078, China.

<sup>9</sup>State Environmental Protection Key Laboratory of Urban Ambient Air Particulate Matter Pollution Prevention and Control, Tianjin Key Laboratory of Urban Transport Emission Research, College of Environmental Science and Engineering, Nankai University, Tianjin 300350, P. R. China.

<sup>10</sup>Institute of Tropical and Marine Meteorology, China Meteorological Administration, Guangzhou, China.

<sup>11</sup>Guangzhou Sub-branch of Guangdong Ecological and Environmental Monitoring Center, Guangzhou 510006, China.

<sup>12</sup>Department of Earth System Science, University of California, Irvine, California, USA.

**Contents of this file**

Text S1 to S2

Figures S1 to S7

Tables S1 to S4

**Text S1.**

LAI and NDVI are effective proxies for urban vegetation cover and photosynthetic biomass, allowing for the monitoring of changes in vegetation structure and productivity over time (Chen and Black, 1992; Forzieri et al., 2020). To provide a more comprehensive representation of urban vegetation density and coverage, we introduced the metrics VI, which was derived from NDVI and LAI using principal component analysis (PCA). The NDVI was derived from corrected measurements of the Advanced Very High Resolution Radiometer, with a spatial resolution of  $0.0833^\circ$  and global coverage from 1990 to 2022 (Pinzon and Tucker, 2014). The LAI data for 2000 – 2021 was obtained from the Global Land Surface Satellite (GLASS) version 6 (LAI V6) with a resolution of  $0.05^\circ$ , while LAI for 1990 – 1999 was sourced from GLASS version 5 (LAI V5). Compared to the LAI V5, the LAI V6 retrieved by the Bi-LSTM deep learning model was more resistant to the noises or missing values and avoided the reconstruction of surface reflectance data (Ma and Liang, 2022). Therefore, in order to obtain more accurate LAI values, a random forest model was employed to correct the values of LAI V5 during 1990 – 1999. LAI V5, NDVI, and time variables (year and month) were used as independent variables to predict LAI V6. The RF model was trained on data from 2005 to 2018 and tested on data from 2000 to 2004. With the  $R^2$  of 0.66 – 0.97, the good performance on the test datasets suggested that the model was effective in correcting the values of LAI V5 and accurately capturing the historical trend of LAI. Additionally, the NDVI and LAI were downscaled to a  $0.25^\circ \times 0.25^\circ$  grid resolution, with the sampling sites at the center, to assess vegetation cover changes at the city scale. Through the PCA analysis, the principal component 1 with an explained variance ratio of 0.98 across all the sites was assigned as VI.

**Text S2.**

The study has the following limitations. First, although the machine learning model we developed showed its data imputation capability at the data-sparse sites, this approach requires site-specific observational data for optimal performance, limiting its immediate global applicability. Future research should explore data-efficient strategies such as semi-supervised learning to overcome this constraint.

Second, our study focuses on ambient isoprene concentrations rather than emissions. Therefore, the results may not directly guide emission-based numerical simulations. However, the predicted concentrations and their drivers, particularly temperature, radiation, and vegetation indices, provide valuable insights into biogenic emission patterns. The pronounced increase in isoprene concentrations observed at the suburban sites in both London and Hong Kong after 2012 served as a compelling evidence of climate warming's impact on biogenic emissions. In Hong Kong, the sustained upward trend in isoprene concentrations over recent decades likely reflected enhanced emissions driven by urban greenspace expansion. The contrasting importance of vegetation indices between these two cities further underscored how regional differences in vegetation composition and emission characteristics influence local air quality. These findings contribute to our understanding of biogenic isoprene emissions under changing climatic and urban conditions, providing crucial insights for sustainable city development in a warming world.

Third, chemical loss of isoprene was not considered with specific proxies in the model. Isoprene is primarily consumed by reacting with hydroxyl radical (OH) in the daytime. Since the availability of OH data is limited, O<sub>3</sub> is generally used as an OH proxy. We attempted to use O<sub>3</sub> as an input feature, but the model showed a positive isoprene-O<sub>3</sub> relationship, due to the similar diurnal patterns between them, contributions of isoprene to O<sub>3</sub>, and their common sensitivities to temperature. It is also difficult to obtain the data of indicative oxidation products of isoprene, such as methyl vinyl ketone. In fact, OH concentration is closely related to meteorological parameters, especially radiation and temperature. By adopting these parameters as input features, we believe that the chemical loss of isoprene was considered by the model. Despite this, the positive responses of isoprene to radiation and temperature suggest that the effect of emissions overwhelmed

86 that of chemical loss. Indeed, this was confirmed by the diurnal pattern of the observed  
87 isoprene concentrations across various sites (Figure S7).  
88 Fourth, we assume the concentrations and compositions of many air pollutants, except  
89 isoprene and  $\text{NO}_x$ , unchanged in the simulation of future  $\text{O}_3$ . This probably led to an  
90 overestimate of  $\text{O}_3$ . However, the conclusions regarding the effects of temperature rise,  
91 isoprene increase and  $\text{NO}_x$  reduction should still hold true.

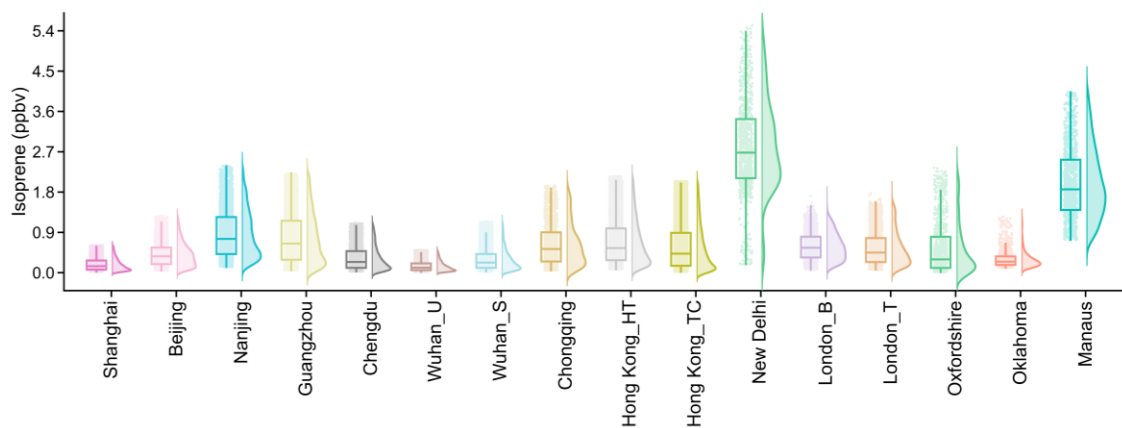

**Figure S1.** Box plot and distribution of isoprene concentrations at each site. The upper and lower edges of the box denote the third and first quartiles, respectively, while the solid line within the box represents the median. The whiskers extend to 1.5 times the interquartile range.

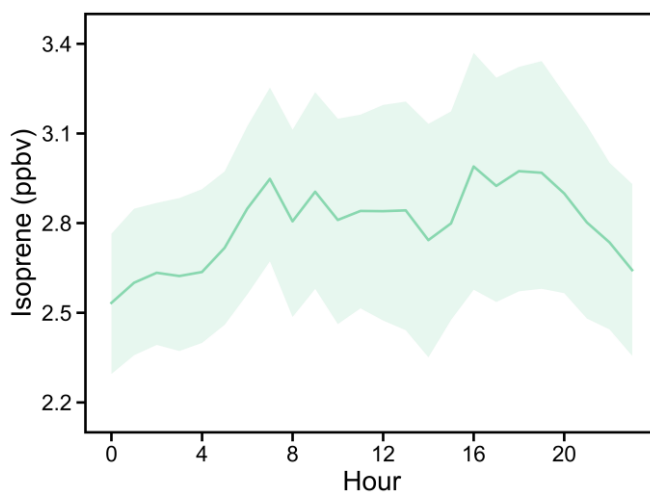

**Figure S2.** Diurnal variations of isoprene concentrations at the New Delhi site. The bands represent 95% confidence intervals.

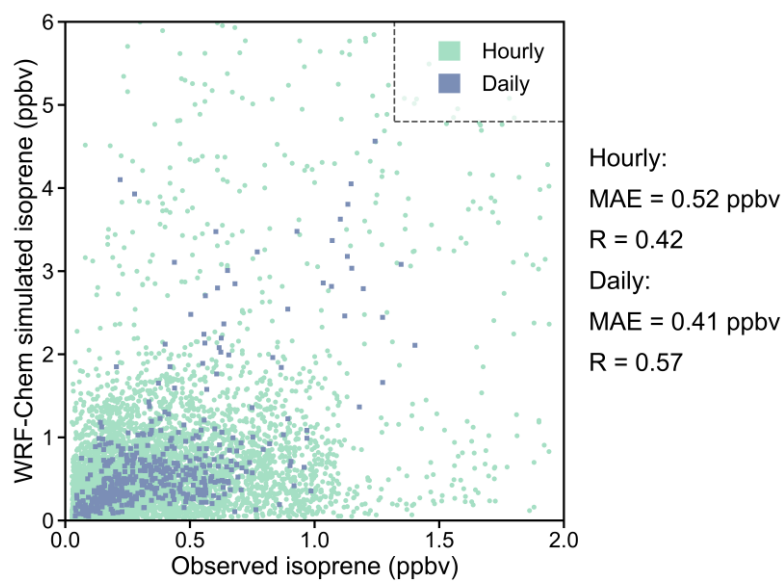

**Figure S3.** Comparisons of WRF-Chem simulated and measured isoprene concentrations.

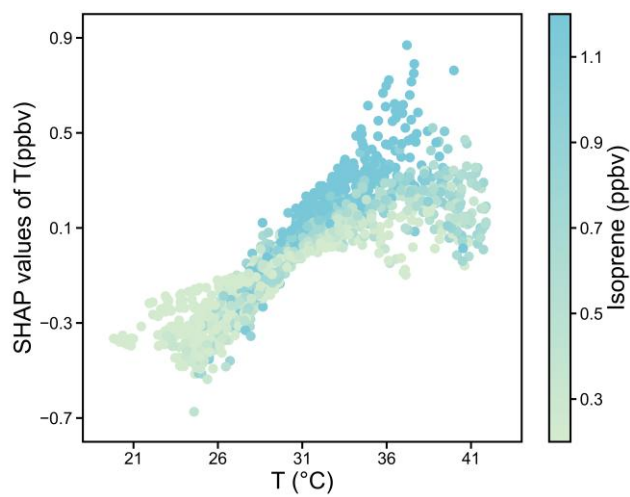

**Figure S4.** The SHAP dependence plot of temperature at the Chongqing site.

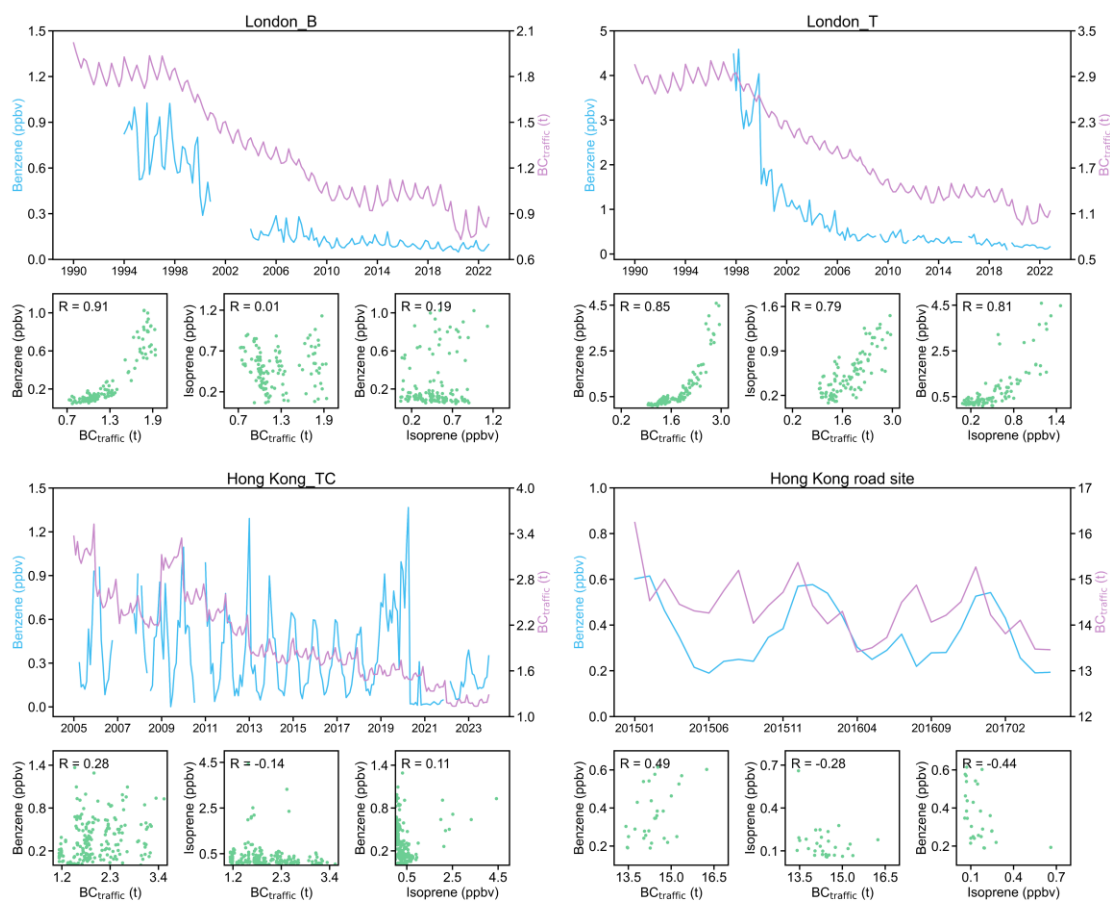

**Figure S5.** Correlation analysis of monthly isoprene concentrations with benzene and  $BC_{\text{traffic}}$  in Hong Kong and London.

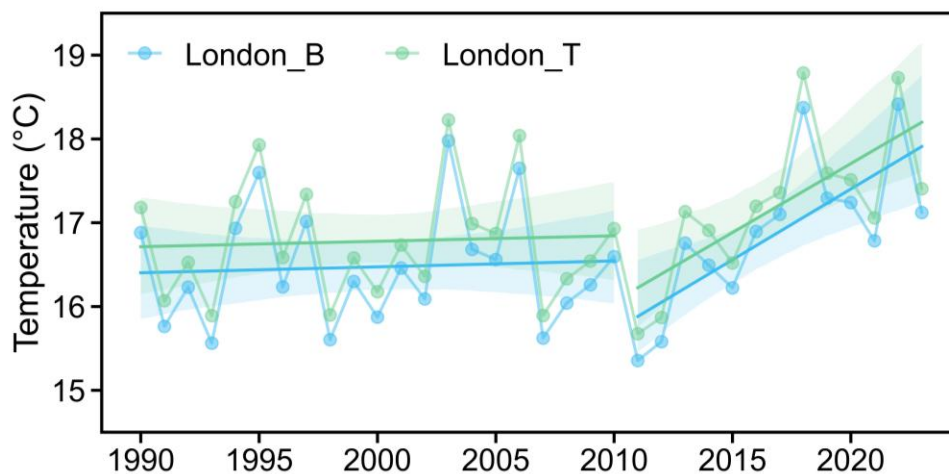

**Figure S6.** Variations of average summer temperature at the London\_B and London\_T sites from 1990 to 2023.

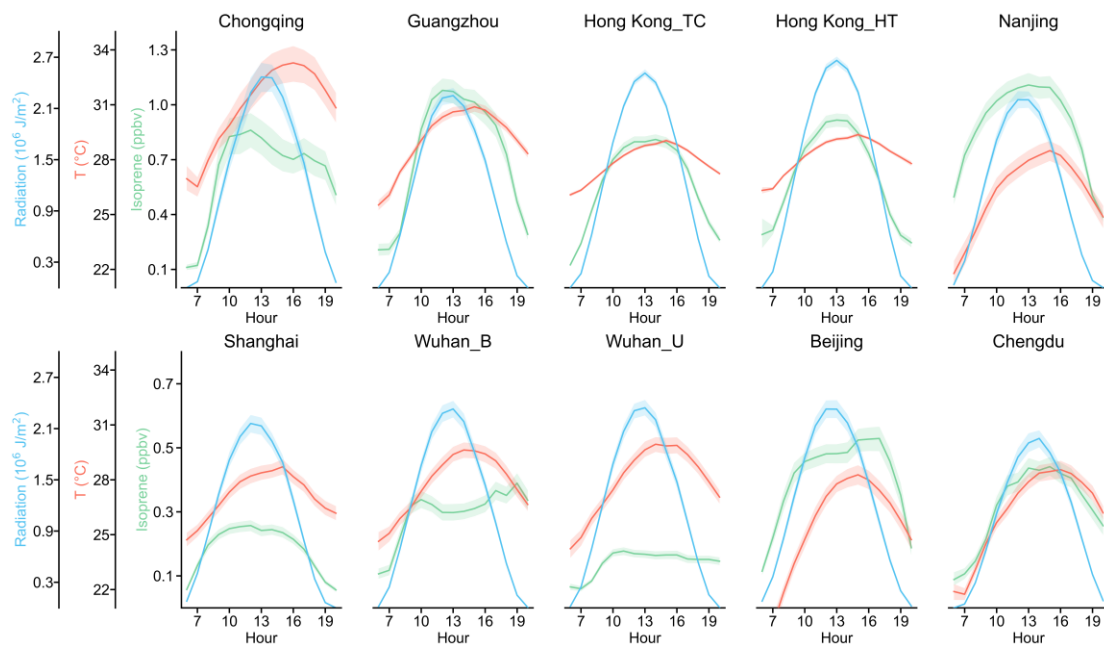

**Figure S7.** Diurnal variations in isoprene concentrations, temperature, and solar radiation across different sites. The bands represent 95% confidence intervals.

| Site         | Time coverage                                       | Latitude | Longitude | Number of<br>valid hourly<br>data | Temporal<br>resolution | Site<br>category | Instrument            |
|--------------|-----------------------------------------------------|----------|-----------|-----------------------------------|------------------------|------------------|-----------------------|
| Beijing      | May to September<br>in 2021 and 2022                | 40.05°   | 116.42°   | 3464                              | hourly                 | Urban<br>site    | GC-FID/MS             |
| Chengdu      | July to September<br>from 2019 to 2022              | 30.66°   | 104.04°   | 4574                              | hourly                 | Urban<br>site    | Synspec GC955-611/811 |
| Chongqing    | July to August in<br>2021 and 2022                  | 29.62°   | 106.51°   | 1503                              | hourly                 | Urban<br>site    | Synspec GC955-611/811 |
| Guangzhou    | May to September<br>in 2019 and 2021                | 23.08°   | 113.37°   | 4111                              | hourly                 | Urban<br>site    | AC-GCMS1000           |
| Hong Kong_TC | May to September<br>from 2005 to 2020               | 22.29°   | 113.94°   | 20775                             | hourly                 | Suburban<br>site | GC-PID                |
| Hong Kong_HT | May to September<br>from 2013 to 2023               | 22.22°   | 114.26°   | 9900                              | hourly                 | Urban<br>site    | GC-PID                |
| Nanjing      | June to October in<br>2017, 2018, 2022,<br>and 2023 | 32.12°   | 118.96°   | 4683                              | hourly                 | Urban<br>site    | GC-MS/FID             |
| Shanghai     | June to September<br>from 2021 to 2023              | 31.17°   | 121.43°   | 4692                              | hourly                 | Urban<br>site    | GC-FID                |
| Wuhan_U      | May to September<br>from 2021 to 2023               | 30.53°   | 114.37°   | 5161                              | hourly                 | Urban<br>site    | GC-FID/MS             |

|             |                                       |        |         |      |        |                  |                                           |
|-------------|---------------------------------------|--------|---------|------|--------|------------------|-------------------------------------------|
| Wuhan_S     | May to September<br>from 2021 to 2023 | 30.60° | 114.28° | 4974 | hourly | Urban<br>site    | GC-FID/MS                                 |
| London_T    | May to<br>September; 1994<br>to 2022  | 51.45° | 0.07°   | 2061 | daily  | Traffic<br>site  | Perkin Elmer Ozone Precursor<br>Analysers |
| London_B    | May to<br>September; 1999<br>to 2022  | 51.52° | 0.16°   | 2063 | daily  | Suburban<br>site | Perkin Elmer Ozone Precursor<br>Analysers |
| Oklahoma    | April to<br>September; 2016           | 36.60° | -97.49° | 1064 | hourly | Rural<br>site    | PTR-MS                                    |
| Manaus      | February to April;<br>2016            | -3.10° | -59.99° | 1194 | hourly | Urban<br>site    | PTR-MS                                    |
| Oxfordshire | June to<br>September; 2018            | 51.46° | -1.20°  | 1025 | hourly | Forest<br>site   | GC-PID                                    |
| New Delhi   | January to March;<br>2018             | 28.45° | 77.28°  | 968  | hourly | Suburban<br>site | PTR-TOF-MS 8000                           |

**Table S1.** Detailed information of isoprene observational data at each site.

| Predictor variables                       | Abbreviations | Temporal coverage | Temporal resolution | Spatial coverage | Spatial resolution |
|-------------------------------------------|---------------|-------------------|---------------------|------------------|--------------------|
| Vegetation index                          | VI            | 1990-2023         | 8 days              | global           | 0.25°              |
| Traffic emissions of black carbon         | BCtraffic     | 1990-2023         | monthly             | global           | 0.1°               |
| 2m Temperature                            | T             | 1990-2023         | hourly              | global           | 0.1°               |
| Surface solar radiation downwards         | SSRD          | 1990-2023         | hourly              | global           | 0.25°              |
| Soil moisture                             | SWV           | 1990-2023         | hourly              | global           | 0.1°               |
| Relative humidity                         | RH            | 1990-2023         | hourly              | global           | 0.1°               |
| Surface pressure                          | SP            | 1990-2023         | hourly              | global           | 0.1°               |
| 10-meter Zonal wind component             | u10           | 1990-2023         | hourly              | global           | 0.1°               |
| 10-meter Meridional wind component        | v10           | 1990-2023         | hourly              | global           | 0.1°               |
| Evaporation from vegetation transpiration | EVAVT         | 1990-2023         | hourly              | global           | 0.1°               |
| Boundary layer height                     | BLH           | 1990-2023         | hourly              | global           | 0.25°              |
| Total precipitation                       | TP            | 1990-2023         | hourly              | global           | 0.1°               |

**Table S2.** Detailed information of variables used for isoprene concentrations prediction.

| Site name | Training strategy | Site type    | Pre-training dataset                          | Fine-tuning/retraining dataset                                               |
|-----------|-------------------|--------------|-----------------------------------------------|------------------------------------------------------------------------------|
| Chongqing | T-training        | Pre-training | Data from pre-training sites except Chongqing | Training data from Chongqing                                                 |
|           | NT-training       |              | /                                             | Training data from Chongqing                                                 |
|           | MIX-training      |              | /                                             | Data from pre-training sites except Chongqing + Training data from Chongqing |
| Chengdu   | T-training        | Pre-training | Data from pre-training sites except Chengdu   | Training data from Chengdu                                                   |
|           | NT-training       |              | /                                             | Training data from Chengdu                                                   |
|           | MIX-training      |              | /                                             | Data from pre-training sites except Chengdu + Training data from Chengdu     |
| Wuhan_U   | T-training        | Pre-training | Data from pre-training sites except Wuhan_U   | Training data from Wuhan_U                                                   |
|           | NT-training       |              | /                                             | Training data from Wuhan_U                                                   |
|           | MIX-training      |              | /                                             | Data from pre-training sites except Wuhan_U + Training data from Wuhan_U     |
| Wuhan_S   | T-training        | Pre-training | Data from pre-training sites except Wuhan_S   | Training data from Wuhan_S                                                   |
|           | NT-training       |              | /                                             | Training data from Wuhan_S                                                   |
|           | MIX-training      |              | /                                             | Data from pre-training sites except Wuhan_S + Training data from Wuhan_S     |
| Shanghai  | T-training        | Pre-training | Data from pre-training sites except Shanghai  | Training data from Shanghai                                                  |
|           | NT-training       |              | /                                             | Training data from Shanghai                                                  |

|                 |              |                  |                                                  |                                                                                       |
|-----------------|--------------|------------------|--------------------------------------------------|---------------------------------------------------------------------------------------|
|                 | MIX-training |                  | /                                                | Data from pre-training sites except Shanghai +<br>Training data from Shanghai         |
| Nanjing         | T-training   | Pre-<br>training | Data from pre-training sites except Nanjing      | Training data from Nanjing                                                            |
|                 | NT-training  |                  | /                                                | Training data from Nanjing                                                            |
|                 | MIX-training |                  | /                                                | Data from pre-training sites except Nanjing +<br>Training data from Nanjing           |
| Beijing         | T-training   | Pre-<br>training | Data from pre-training sites except Beijing      | Training data from Beijing                                                            |
|                 | NT-training  |                  | /                                                | Training data from Beijing                                                            |
|                 | MIX-training |                  | /                                                | Data from pre-training sites except Beijing +<br>Training data from Beijing           |
| Hong<br>Kong_TC | T-training   | Pre-<br>training | Data from pre-training sites except Hong Kong_TC | Training data from Hong Kong_TC                                                       |
|                 | NT-training  |                  | /                                                | Training data from Hong Kong_TC                                                       |
|                 | MIX-training |                  | /                                                | Data from pre-training sites except Hong<br>Kong_TC + Training data from Hong Kong_TC |
| Hong<br>Kong_HT | T-training   | Pre-<br>training | Data from pre-training sites except Hong Kong_HT | Training data from Hong Kong_HT                                                       |
|                 | NT-training  |                  | /                                                | Training data from Hong Kong_HT                                                       |
|                 | MIX-training |                  | /                                                | Data from pre-training sites except Hong<br>Kong_HT + Training data from Hong Kong_HT |
| Guangzhou       | T-training   | Pre-<br>training | Data from pre-training sites except Guangzhou    | Training data from Guangzhou                                                          |
|                 | NT-training  |                  | /                                                | Training data from Guangzhou                                                          |

|             |                              |            |                        |                                                                                 |
|-------------|------------------------------|------------|------------------------|---------------------------------------------------------------------------------|
|             | MIX-training                 |            | /                      | Data from pre-training sites except Guangzhou +<br>Training data from Guangzhou |
| London_T    | PINN-<br>ResMLP <sub>T</sub> | Validation | All pre-training sites | Training data from London_T                                                     |
|             | other models                 |            | /                      | Training data from London_T                                                     |
| London_B    | PINN-<br>ResMLP <sub>T</sub> | Validation | All pre-training sites | Training data from London_B                                                     |
|             | other models                 |            | /                      | Training data from London_B                                                     |
| New Delhi   | PINN-<br>ResMLP <sub>T</sub> | Validation | All pre-training sites | Training data from New Delhi                                                    |
|             | other models                 |            | /                      | Training data from New Delhi                                                    |
| Manaus      | PINN-<br>ResMLP <sub>T</sub> | Validation | All pre-training sites | Training data from Manaus                                                       |
|             | other models                 |            | /                      | Training data from Manaus                                                       |
| Oklahoma    | PINN-<br>ResMLP <sub>T</sub> | Validation | All pre-training sites | Training data from Oklahoma                                                     |
|             | other models                 |            | /                      | Training data from Oklahoma                                                     |
| Oxfordshire | PINN-<br>ResMLP <sub>T</sub> | Validation | All pre-training sites | Training data from Oxfordshire                                                  |
|             | other models                 |            | /                      | Training data from Oxfordshire                                                  |

**Table S3.** Pre-training and fine-tuning datasets for different training strategies at each site.

| Machine learning algorithm             | Hyperparameters                                                                                                   | Number of models |
|----------------------------------------|-------------------------------------------------------------------------------------------------------------------|------------------|
| Extreme gradient boosting (XGB)        | n_estimators: 100, 200, 300<br>max_depth: 20, 30<br>learning_rate: 0.2, 0.5, 0.8, 1<br>colsample_bytree: 0.8, 1.0 | 48               |
| Random forest (RF)                     | n_estimators: 100, 200, 300<br>min_samples_split: 5, 10, 15, 20<br>max_depth: 10, 20                              | 24               |
| Gradient boosting decision tree (GBDT) | n_estimators: 100, 200, 300<br>learning_rate: 0.1, 0.3, 0.6, 0.8, 1                                               | 15               |
| Support vector machine (SVM)           | C: 1, 5, 10, 100, 1000<br>kernel: linear, poly, rbf                                                               | 15               |
| Linear regression (LR)                 | default                                                                                                           | 1                |

**Table S4.** Hyperparameters used for different machine learning algorithms.

## Reference

- Chen, J. M. and Black, T. A.: Defining leaf area index for non-flat leaves, *Plant, Cell Environ.*, 15, 421-429, <https://doi.org/10.1111/j.1365-3040.1992.tb00992.x>, 1992.
- Forzieri, G., Miralles, D. G., Ciais, P., et al.: Increased control of vegetation on global terrestrial energy fluxes, *Nat. Clim. Change*, 10, 356-362, 10.1038/s41558-020-0717-0, 2020.
- Ma, H. and Liang, S.: Development of the GLASS 250-m leaf area index product (version 6) from MODIS data using the bidirectional LSTM deep learning model, *Remote Sens. Environ.*, 273, 112985, <https://doi.org/10.1016/j.rse.2022.112985>, 2022.
